# Supplementary material for: Qualitative Behavioural Assessment as a Method to Identify Potential Stressors during Commercial Sheep Transport
Source: PubMed Central journal article supplement (PMC6262568; doi:10.3390/ani8110209), 2018-11-15
Supplement: animals-08-00209-s001.pdf [file animals-08-00209-s001.pdf]

# Supplementary Materials: Qualitative Behavioural Assessment as a Method to Identify Potential Stressors During Commercial Sheep Transport

Teresa Collins <sup>1,\*</sup>, Catherine A. Stockman <sup>1</sup>, Anne L. Barnes <sup>1</sup>, David W. Miller <sup>1</sup>, Sarah L. Wickham <sup>1</sup> and Patricia A. Fleming <sup>1\*</sup>

School of Veterinary & Life Sciences, Murdoch University, Murdoch, WA 6150, Australia; c.stockman@murdoch.edu.au (C.A.S.); a.barnes@murdoch.edu.au (A.L.B.); D.Miller@murdoch.edu.au (D.W.M.); sarahlwickham@outlook.com (S.L.W.); t.fleming@murdoch.edu.au (P.A.F.)

\* Correspondence: t.collins@murdoch.edu.au;

Received: 3 October 2018; Accepted: 9 November 2018; Published: 15 November 2018

## Supplementary Materials S1: Section 1 of Questionnaire.

To keep your identity anonymous please create a unique code from the following

- First two letters of your mothers first name
- First two letters of your fathers first name
- Day of the month you were born (e.g. 4<sup>th</sup> = 04, 17<sup>th</sup> = 17)

These four letters and two numbers make up your unique code (e.g. SIAL17)

Your Unique Code is: \_\_\_\_\_

- Age:  19 or under  20–29  30–39  40–49  50–59  60–69  70+
- Gender:  Male  Female
- Country of birth
- Nationality
- Current position  Undergraduate student  Postgraduate student  
 Staff  Other
- Area of study/employment  Biological Science & Biotechnology  Business  
 Chemical & Mathematical Science  Chiropractic  Engineering & Energy  Environmental  
Science  Education  IT  Law  Media  Nursing  Pharmacy  Psychology   
Sustainability  
 Social Science & Humanities  Animal Science  Veterinary science  Biomedical  
Science  Other
- Do you **currently** live on:  an urban property/environment  
 a rural property/environment
- Have you **ever lived** on a rural property/environment  Yes  No  
If yes, how long did you live there  
 Less than 1 month  
 1 – 6 months  
 6 – 12 months  
 1 – 2 years  
 More than 2 years



- Occasionally (Less than once a week)
- Often (1–4 times a week)
- Always (> 5 times a week)

17. What factors do you consider when eating the following:

- |                         | Poultry                  | Lamb                     | Beef                     | Fish                     | Eggs                     | Dairy                    |
|-------------------------|--------------------------|--------------------------|--------------------------|--------------------------|--------------------------|--------------------------|
| Vegetarian              | <input type="checkbox"/> | <input type="checkbox"/> | <input type="checkbox"/> | <input type="checkbox"/> | <input type="checkbox"/> | <input type="checkbox"/> |
| Religion                | <input type="checkbox"/> | <input type="checkbox"/> | <input type="checkbox"/> | <input type="checkbox"/> | <input type="checkbox"/> | <input type="checkbox"/> |
| Dietary intolerance     | <input type="checkbox"/> | <input type="checkbox"/> | <input type="checkbox"/> | <input type="checkbox"/> | <input type="checkbox"/> | <input type="checkbox"/> |
| Dislike product         | <input type="checkbox"/> | <input type="checkbox"/> | <input type="checkbox"/> | <input type="checkbox"/> | <input type="checkbox"/> | <input type="checkbox"/> |
| Animal welfare concerns | <input type="checkbox"/> | <input type="checkbox"/> | <input type="checkbox"/> | <input type="checkbox"/> | <input type="checkbox"/> | <input type="checkbox"/> |
| Food safety             | <input type="checkbox"/> | <input type="checkbox"/> | <input type="checkbox"/> | <input type="checkbox"/> | <input type="checkbox"/> | <input type="checkbox"/> |
| Cost                    | <input type="checkbox"/> | <input type="checkbox"/> | <input type="checkbox"/> | <input type="checkbox"/> | <input type="checkbox"/> | <input type="checkbox"/> |
| Other.....              | <input type="checkbox"/> | <input type="checkbox"/> | <input type="checkbox"/> | <input type="checkbox"/> | <input type="checkbox"/> | <input type="checkbox"/> |

18. Do you believe you purchasing animal welfare friendly products can positively influence animal welfare?

No  Don't know  Yes

Comments

19. If you consume meat, dairy or eggs, are you personally responsible for the purchasing these products?

Yes  No  Not applicable

Comments

20. Do you believe animal welfare should be improved in Australia?

No  Not sure  Yes

---

Comments

21. What factors influence your assessment of animal welfare?

- Media
- Education
- Personal experience
- Family/social/peers
- Religion
- Not sure
- Other

Comments

22. As a consumer, would you be willing to pay more for products coming from facilities that are enhancing welfare beyond current industry standards?

Yes  No

Comments

23. How do you rate the welfare of **sheep** in Australia?

Poor  Excellent

---

24. How do you rate the welfare of **sheep during road transport** in Australia?

Poor Excellent

---

25. How do you rate the welfare of sheep during **live export by sea**?

Poor Excellent

---

26. How do you rate the welfare of Australian exported sheep at their foreign destination?

Poor Excellent

---

Section 2 of Questionnaire: Your Unique Code is: \_\_\_\_\_

1. I can tell how a group of sheep are feeling by the way they behave

*(please put a dash on the line at the appropriate place)*

Strongly disagree Strongly agree

\_\_\_\_\_  
Comments

2. I believe animal welfare is important

Strongly disagree Strongly agree

\_\_\_\_\_  
Comments

3. I am influenced by the media in my perceptions of animal welfare

Strongly disagree Strongly agree

\_\_\_\_\_  
Comments

4. Sheep show visible behavioural responses

Strongly disagree Strongly agree

\_\_\_\_\_  
Comments

5. It doesn't matter what a person's background is, they will be able to tell how sheep are feeling

Strongly disagree Strongly agree

\_\_\_\_\_  
Comments

6. People who don't eat meat are better able to interpret how sheep are behaving

Strongly disagree Strongly agree

\_\_\_\_\_  
Comments

7. People who have pets are better able to interpret how sheep are behaving  
 Strongly disagree Strongly agree
- 

Comments

8. People who have no preconceived ideas of sheep behaviour are better able to interpret how sheep are behaving  
 Strongly disagree Strongly agree
- 

Comments

Supplementary Materials S2: Vehicle driver questionnaire.

**Driver Questionnaire**

**Drivers involved in multiple journeys are only asked to complete Part B once**

| Driver details                                                |                                        |
|---------------------------------------------------------------|----------------------------------------|
| Gender                                                        |                                        |
| Age group                                                     | Less than 30      31 – 50      51 – 70 |
| Journey number that day                                       |                                        |
| Experience in driving (year)                                  |                                        |
| Total number of hours worked that day (at completion of trip) |                                        |

1. What do you believe should be the most important priorities for improvement of the livestock transport industry?
2. In terms of animal welfare during road transport, do you believe:
  - a. Improvements are needed
  - b. No improvements are needed
3. If answered (a), then what do you think are the most important animal welfare issues that need to be addressed during road transport?
4. Is the monitoring of sheep with respect to animal welfare during road transport adequate?  
 Yes    No    Don't know
5. If no, how do you believe the monitoring could be improved?
6. In your experience do you believe you are able to tell how a sheep is feeling (e.g. stressed, content, fatigued) by the way it behaves?  
 Yes    No    Don't know
7. If yes, do you think you are able to tell if a sheep's welfare is compromised by the way it behaves?  
 All the time    Some of the time    None of the time    Don't know
8. What specific behaviours would indicate to you that a sheep's welfare is compromised?
9. It doesn't matter what a person's background is, they will be able to tell how an animal is feeling by the way it behaves  
 Yes    No    Don't know

Comments

Supplementary Materials S3: Transport event questionnaire.

### Details of transport event

| Journey Details                  |                                                                                                               |
|----------------------------------|---------------------------------------------------------------------------------------------------------------|
| Journey code                     | Date (0101):<br><br>Day journey number for that driver (01):<br><br>Driver initials (CS):<br><br><b>CODE:</b> |
| Date                             |                                                                                                               |
| Time of departure                |                                                                                                               |
| Place of departure               |                                                                                                               |
| Odometer at departure            |                                                                                                               |
| Odometer at arrival              |                                                                                                               |
| Place of arrival                 |                                                                                                               |
| Time of arrival                  |                                                                                                               |
| Number and duration of stops     |                                                                                                               |
| Comments/reasons for stops       |                                                                                                               |
| Weather conditions               |                                                                                                               |
| Vehicle details                  |                                                                                                               |
| Type of vehicle                  |                                                                                                               |
| Year of manufacture              |                                                                                                               |
| Position of cameras              | <b>Diagram</b>                                                                                                |
| Time camera turned on            |                                                                                                               |
| Successful recording (circle)    | Yes                  No                                                                                       |
| Use of dog (circle)              | Loading                  Unloading                                                                            |
| Placement of dog in front crate? |                                                                                                               |
| Use of prodder                   | Loading                  Unloading                                                                            |
| Cleanliness of vehicle (comment) |                                                                                                               |
| Experimental animal details      |                                                                                                               |
| Breed                            |                                                                                                               |
| Sex                              |                                                                                                               |
| Age                              |                                                                                                               |

|                        |                                                                                                                                                   |
|------------------------|---------------------------------------------------------------------------------------------------------------------------------------------------|
| Average Weight         |                                                                                                                                                   |
| Total stock on vehicle |                                                                                                                                                   |
| Number of stock in pen |                                                                                                                                                   |
| Approx size of pen     |                                                                                                                                                   |
| Place of origin        | Feedlot    Station    Pasture managed    Other                                                                                                    |
| Curfew                 | Feed curfew (circle)    yes    no<br>Time off feed before loading:<br>Water curfew (circle)    yes    no<br>Time off water before loading:        |
| Cohort details         | Are all experimental sheep from same location    yes    no<br>If no, detail:<br>Cohort number (in order of loading) and approx number from each : |
